# Supplementary material for: Remote Sensing of Grassland Biophysical Parameters in the Context of the Sentinel-2 Satellite Mission
Source: Hindawi journal article supplement (doi:10.1155/2016/4612809), 2016-01-01
Supplement: f1 [file 4612809.f1.pdf]

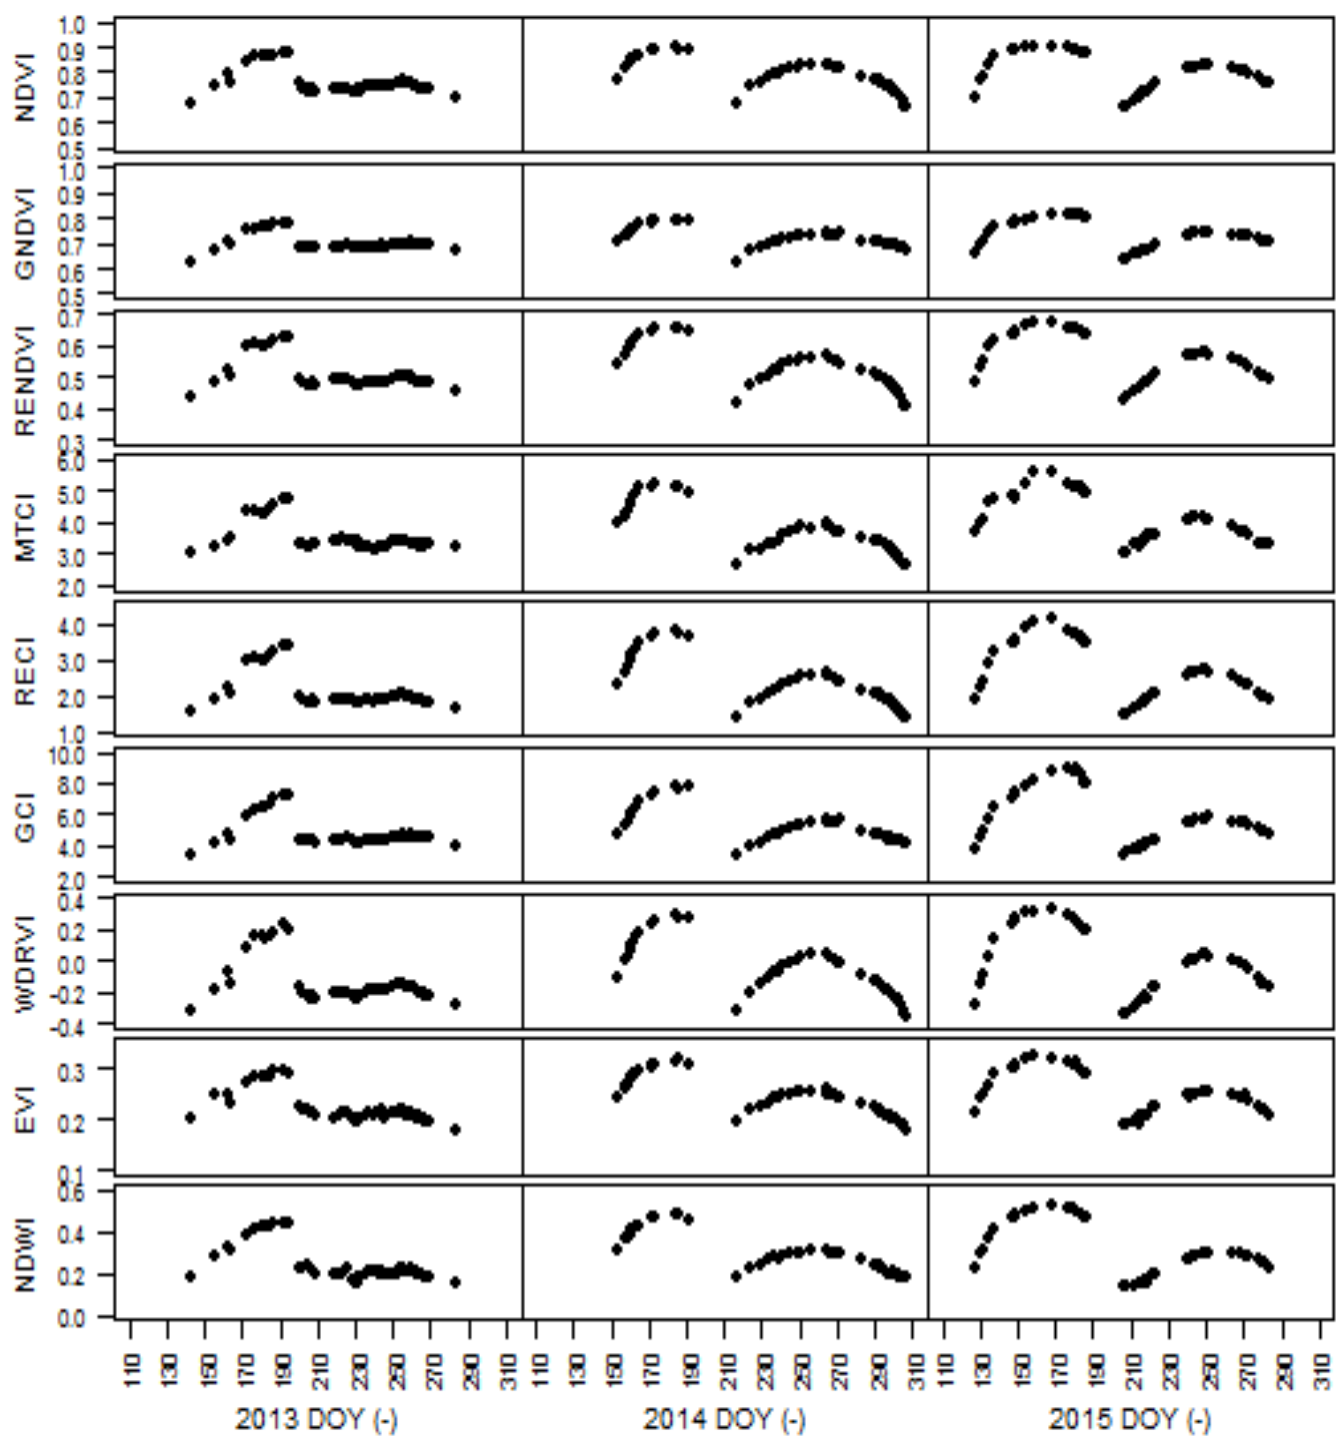

**Figure A.** Seasonal trends of measured spectral vegetation indices (VIs) in the growing season of 2013 (left panel), 2014 (middle panel) and 2015 (right panel): normalized difference vegetation index (NDVI), green normalized difference vegetation index (GNDVI), red-edge normalized difference vegetation index (RENDVI), MERRIS terrestrial chlorophyll index (MTCI), red-edge chlorophyll index (RECI), green chlorophyll index (GCI), wide dynamic range vegetation index (WDRVI), enhanced vegetation index (EVI) and normalized difference water (NDWI).
